# Supplementary material
Source: PubMed Central journal article supplement (PMC6300630)
Supplement: 2db5c541c9b857f5e0d4518668c2ce6d_IAI.00703-18-s0001.pdf [file 2db5c541c9b857f5e0d4518668c2ce6d_IAI.00703-18-s0001.pdf]

Fig S1

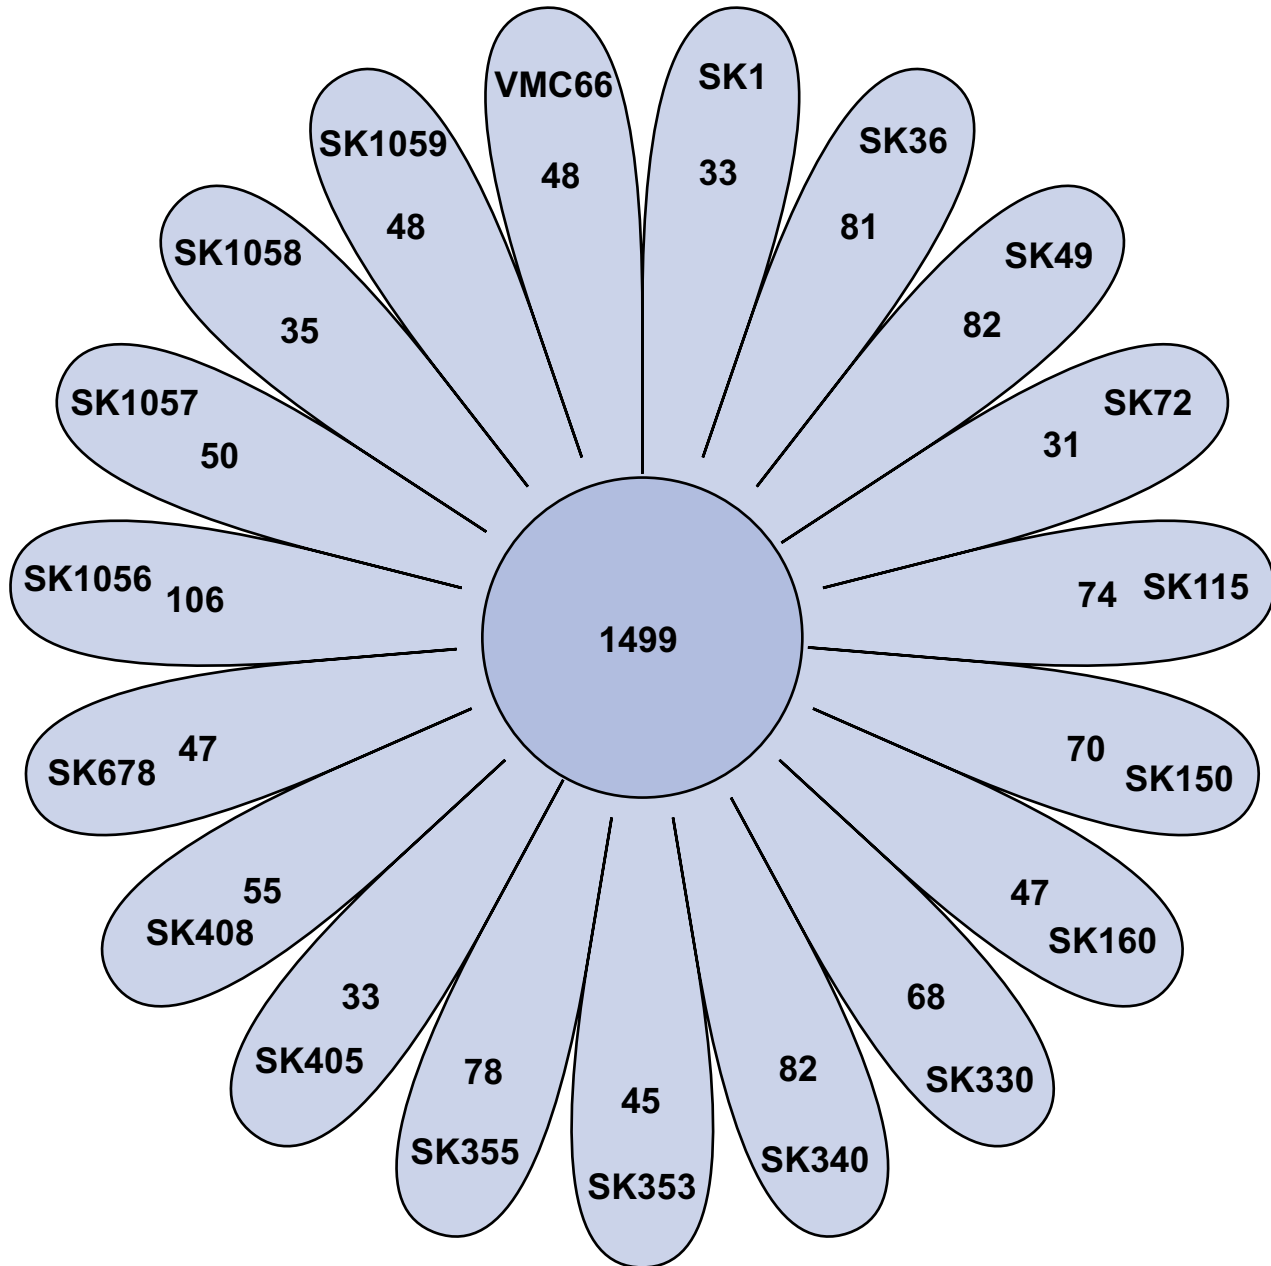

Fig S1 Graphical representation of core genome (center) and unique genes (petals).

**Table S1** Blood vs. oral gene comparison

| <b>SK405 Locus_Tag</b> | <b>Predicted Function</b>                              | <b>Oral<sup>1</sup></b> | <b>Blood<sup>2</sup></b> |
|------------------------|--------------------------------------------------------|-------------------------|--------------------------|
| HMPREF9390_RS07860     | hypothetical lipoprotein                               | 2                       | 8                        |
| HMPREF9390_RS08320     | Phosphoribosyl transferase (PRT)-type I domain protein | 2                       | 6                        |
| HMPREF9390_RS08325     | Phosphoribosyl transferase (PRT)                       | 2                       | 6                        |
| HMPREF9390_RS08330     | YceG family protein                                    | 2                       | 6                        |
| HMPREF9390_RS08335     | TelA                                                   | 2                       | 6                        |
| HMPREF9390_RS08340     | TerD3 family protein                                   | 2                       | 6                        |
| HMPREF9390_RS08345     | TerD2 family protein                                   | 2                       | 6                        |
| HMPREF9390_RS08350     | TerD family protein                                    | 2                       | 6                        |
| HMPREF9390_RS08355     | calcium-translocating P-type ATPase, PMCA-type         | 2                       | 6                        |
| HMPREF9390_RS08360     | haloacid dehalogenase-like hydrolase                   | 2                       | 6                        |
| HMPREF9390_RS08365     | ATP/GTP-binding protein                                | 2                       | 6                        |

<sup>1</sup>Number of genomes of oral isolates containing the designated gene.

<sup>2</sup>Number of genomes of blood isolates containing the designated gene.

**Table S2** Candidate virulence genes

| SK405 Locus_Tag                 | Predicted Function                                     | Less Virulent <sup>1</sup> | More Virulent <sup>2</sup> |
|---------------------------------|--------------------------------------------------------|----------------------------|----------------------------|
| HMPREF9390_RS00505              | hypothetical protein                                   | 0                          | 3                          |
| HMPREF9390_RS01040 <sup>3</sup> | zinc-binding dehydrogenase family oxidoreductase       | 0                          | 3                          |
| HMPREF9390_RS01045              | TetR family transcriptional regulator                  | 0                          | 3                          |
| HMPREF9390_RS01515              | molecular chaperone HscC                               | 0                          | 3                          |
| HMPREF9390_RS01520              | hypothetical protein                                   | 0                          | 3                          |
| HMPREF9390_RS03570              | ABC transporter ATP-binding protein                    | 0                          | 3                          |
| HMPREF9390_RS03575              | ABC transporter permease                               | 0                          | 3                          |
| HMPREF9390_RS03635              | membrane protein                                       | 0                          | 3                          |
| HMPREF9390_RS06090              | hypothetical protein                                   | 0                          | 3                          |
| HMPREF9390_RS06105              | N-acetyltransferase                                    | 0                          | 3                          |
| HMPREF9390_RS06115              | alpha/beta hydrolase                                   | 0                          | 3                          |
| HMPREF9390_RS06500              | glycosyl transferase family 1                          | 0                          | 3                          |
| HMPREF9390_RS06505              | von Willebrand factor A                                | 0                          | 3                          |
| HMPREF9390_RS07665              | hypothetical protein                                   | 0                          | 3                          |
| HMPREF9390_RS07670              | alpha/beta hydrolase                                   | 0                          | 3                          |
| HMPREF9390_RS07780              | hypothetical protein                                   | 0                          | 3                          |
| HMPREF9390_RS08320              | Phosphoribosyl transferase (PRT)-type I domain protein | 0                          | 3                          |
| HMPREF9390_RS08325              | Phosphoribosyl transferase (PRT)                       | 0                          | 3                          |
| HMPREF9390_RS08330              | YceG family protein                                    | 0                          | 3                          |
| HMPREF9390_RS08335              | TelA                                                   | 0                          | 3                          |
| HMPREF9390_RS08340              | TerD3 family protein                                   | 0                          | 3                          |
| HMPREF9390_RS08345              | TerD2 family protein                                   | 0                          | 3                          |
| HMPREF9390_RS08350              | TerD family protein                                    | 0                          | 3                          |
| HMPREF9390_RS08355              | calcium-translocating P-type ATPase, PMCA-type         | 0                          | 3                          |
| HMPREF9390_RS08360              | haloacid dehalogenase-like hydrolase                   | 0                          | 3                          |
| HMPREF9390_RS08365              | ATP/GTP-binding protein                                | 0                          | 3                          |
| HMPREF9390_RS09105              | hypothetical protein                                   | 0                          | 3                          |
| HMPREF9390_RS09160              | hypothetical protein                                   | 0                          | 3                          |
| HMPREF9390_RS09535              | TIGR01741 family protein                               | 0                          | 3                          |
| HMPREF9390_RS11625              | hypothetical protein                                   | 0                          | 3                          |

<sup>1</sup>Less virulent strains include SK330, SK115, SK49 and SK355.<sup>2</sup>More virulent strains include SK405, SK678 and SK 160.<sup>3</sup>Highlighting indicates contiguous genes.

**Table S3** Phage prediction.

| Strain             | Len (kb) | Score <sup>1</sup> | Annotation   | Number of Proteins | Coordinates     | GC%   | Phage <sup>2</sup> |
|--------------------|----------|--------------------|--------------|--------------------|-----------------|-------|--------------------|
| SK1 <sup>3,4</sup> | 7.5      | 10                 | incomplete   | 8                  | 28468-35983     | 45.22 | 1                  |
| SK1056             | 7.5      | 10                 | incomplete   | 8                  | 2334967-2342481 | 45.51 | 1                  |
| SK1059             | 7.5      | 10                 | incomplete   | 8                  | 1830314-1837829 | 45.02 | 1                  |
| SK330 <sup>5</sup> | 7.5      | 10                 | incomplete   | 8                  | 28488-35993     | 45.3  | 1                  |
| SK340              | 7.5      | 10                 | incomplete   | 8                  | 533992-541507   | 45.29 | 1                  |
| SK353              | 7.5      | 10                 | incomplete   | 9                  | 62142-69658     | 45.44 | 1                  |
| SK355              | 7.5      | 10                 | incomplete   | 10                 | 28477-36003     | 45.3  | 1                  |
| SK405              | 7.5      | 10                 | incomplete   | 8                  | 28452-35966     | 45.15 | 1                  |
| SK408              | 7.5      | 10                 | incomplete   | 9                  | 28463-35978     | 45.33 | 1                  |
| SK678              | 7.5      | 10                 | incomplete   | 8                  | 28471-35986     | 45.21 | 1                  |
| VMC66              | 7.5      | 10                 | incomplete   | 9                  | 28440-35955     | 45.17 | 1                  |
| SK72               | 7.7      | 40                 | incomplete   | 7                  | 1343249-1351022 | 43.67 | 2                  |
| SK49               | 8.4      | 50                 | incomplete   | 8                  | 978694-987180   | 43.25 | 2                  |
| SK1058             | 9.3      | 60                 | incomplete   | 10                 | 1592356-1601754 | 42.93 | 2                  |
| SK115              | 12       | 70                 | questionable | 11                 | 324086-336155   | 43.84 | 2                  |
| SK1                | 7.9      | 20                 | incomplete   | 8                  | 604244-612221   | 44.5  | 3                  |
| SK678              | 7.9      | 20                 | incomplete   | 8                  | 1194559-1202536 | 44.5  | 3                  |
| SK1059             | 8        | 20                 | incomplete   | 9                  | 1762979-1770988 | 40.01 | 4                  |
| SK340              | 8        | 20                 | incomplete   | 9                  | 32320-40327     | 39.86 | 4                  |
| SK353              | 8        | 20                 | incomplete   | 9                  | 2256434-2264443 | 39.79 | 4                  |
| SK408              | 9.7      | 10                 | incomplete   | 11                 | 323822-333574   | 33.98 | 5                  |
| SK678              | 21.8     | 20                 | incomplete   | 16                 | 315436-337313   | 36.35 | 5                  |
| SK408              | 10.2     | 10                 | incomplete   | 10                 | 212919-223191   | 45.33 | 6                  |
| SK1056             | 11.6     | 50                 | incomplete   | 13                 | 675056-686659   | 39.23 | 7                  |
| SK353              | 12.3     | 10                 | incomplete   | 9                  | 1000348-1012646 | 44.62 | 8                  |
| SK355              | 12.3     | 10                 | incomplete   | 8                  | 1424349-1436685 | 45.02 | 8                  |
| SK1059             | 13       | 30                 | incomplete   | 16                 | 951986-965067   | 40.25 | 9                  |
| SK150              | 26.4     | 30                 | incomplete   | 23                 | 522736-549138   | 36.15 | 10                 |
| SK160              | 31.7     | 40                 | incomplete   | 24                 | 2138865-2170652 | 42.22 | 11                 |
| SK72               | 35.5     | 80                 | questionable | 34                 | 1274314-1309911 | 39.79 | 12                 |
| SK405              | 40       | 40                 | incomplete   | 16                 | 607936-648000   | 41.91 | 13                 |
| SK115              | 44.9     | 90                 | questionable | 42                 | 357854-402792   | 41.06 | 14                 |
| SK1057             | 51.6     | 100                | complete     | 53                 | 928157-1033829  | 39.46 | 15                 |
| SK36               | 7        | 40                 | incomplete   | 7                  | 1376694-1383753 | 44.66 | 16                 |
| SK355              | 7        | 30                 | incomplete   | 10                 | 432225-439243   | 42.48 | 17                 |

<sup>1</sup>PHASTER score. Range is from 10-100. Phage regions scoring 100 are considered complete.

<sup>2</sup>Like numbers indicate a shared phage as determined by manual BLAST analysis.

<sup>3</sup>Black text = oral strains

<sup>4</sup>Red text = IE isolates

<sup>5</sup>Blue highlight = strains not included in the Bar-seq experiment

**Table S4** Sequence alterations made to nucleotide files that were required to run PGAP.

| Sequence ID        | Strain and file | Alteration                                                                                                             |
|--------------------|-----------------|------------------------------------------------------------------------------------------------------------------------|
| HMPREF9398_RS11715 | VMC66.nuc       | removed last C and added a stop codon                                                                                  |
| HMPREF9398_RS03620 | VMC66.nuc       | added an AG to complete stop codon                                                                                     |
| HMPREF9398_RS03630 | VMC66.nuc       | removed last A and added a stop codon (TAG)                                                                            |
| HMPREF9398_RS03625 | VMC66.nuc       | removed last A and added a stop codon (TAG)                                                                            |
| HMPREF9388_RS04845 | SK353.nuc       | added an AG to complete stop codon                                                                                     |
| HMPREF9392_RS10655 | SK1058.nuc      | added TAG stop codon                                                                                                   |
| HMPREF9392_RS00005 | SK1058.nuc      | removed last A and added a stop codon (TAG)                                                                            |
| HMPREF9381_RS00940 | SK72.nuc        | removed last T and added a stop codon                                                                                  |
| HMPREF9381_RS00045 | SK72.nuc        | removed the last G and added a stop codon                                                                              |
| HMPREF9382_RS09320 | SK115.nuc       | added an AG to complete stop codon                                                                                     |
| HMPREF9383_RS06900 | SK150.nuc       | removed last two A's                                                                                                   |
| HMPREF9383_RS00045 | SK150.nuc       | added TAG stop codon                                                                                                   |
| HMPREF9378_RS00040 | SK1.nuc         | removed last two A's                                                                                                   |
| HMPREF9378_RS11090 | SK1.nuc         | added a G (aa file had additional Ala, nucleotide file was one nuc short of coding for an A. CG-. A final G was added. |
| HMPREF9391_RS11795 | SK408.nuc       | added TAG stop codon                                                                                                   |
| HMPREF9395_RS00040 | SK678.nuc       | added a G (aa file had additional Ala, nucleotide file was one nuc short of coding for an A. GC-. A final G was added. |
| HMPREF9395_RS05400 | SK678.nuc       | removed the last T                                                                                                     |
| HMPREF9397_RS00095 | SK1059.nuc      | removed last C                                                                                                         |
| HMPREF9397_RS04240 | SK1059.nuc      | removed last A                                                                                                         |
| HMPREF9380_RS07690 | SK49.nuc        | added TAG stop codon                                                                                                   |
| HMPREF9389_RS00055 | SK355.nuc       | added TAG stop codon                                                                                                   |
| HMPREF9389_RS10220 | SK355.nuc       | added TAG stop codon                                                                                                   |
| HMPREF9381_RS00945 | SK72.nuc        | added TAG stop codon                                                                                                   |

**Table S5** Primers used in strain construction.

| Primer Name             | Sequence <sup>1</sup>                                                                               | Purpose                                                                                                                                                                                                     |
|-------------------------|-----------------------------------------------------------------------------------------------------|-------------------------------------------------------------------------------------------------------------------------------------------------------------------------------------------------------------|
| 1 spcUP                 | CCGCTCTAGAACTAGTGGATCC                                                                              | <b>Generate SK36 Sc<sup>f</sup> by overlap extension PCR</b><br><i>aad9</i> with native promoter<br><i>aad9</i> with native promoter<br>left fragment<br>left fragment<br>right fragment<br>right fragment  |
| 2 spcDO                 | CAATTTTTTATAATTTTTTAAATCTG                                                                          |                                                                                                                                                                                                             |
| 3 MJY1                  | CCAGACGATCACTTCATCC                                                                                 |                                                                                                                                                                                                             |
| 4 MJY5-R                | GGATCCACTAGTTCAGAGCGGGAATAGAGGTTTTTAAAGAATATTGACAAC                                                 |                                                                                                                                                                                                             |
| 5 MYJ6-F                | CAGATTAATAAAAAATTATAAAAAAATTGCTAGATAAACTTCTGTTCTAC                                                  |                                                                                                                                                                                                             |
| 6 MYJ2-R                | TGTATAGCATTTCATTCCAAG                                                                               |                                                                                                                                                                                                             |
| 7 Tet-F2                | ATGAAAATTATAATATTGGAGT                                                                              | <b>Generate SK36 ΔssaACB Tc<sup>f</sup> by overlap extension PCR</b><br><i>tetM</i><br><i>tetM</i><br>left fragment<br>left fragment<br>right fragment<br>right fragment                                    |
| 8 Tet-R2                | TCACTAAGTTATTTTTATTGAACAT                                                                           |                                                                                                                                                                                                             |
| 9 0262-F1               | GCACGATGATAAGCTCCTG                                                                                 |                                                                                                                                                                                                             |
| 10 0262-R1              | CCAATATTAATAATTTTCAITCTCATACACCTCTATAGT                                                             |                                                                                                                                                                                                             |
| 11 0260T-F3             | CAATAAAATAACTTAGTGATAATAAAAGGTTAGGAAGACA                                                            | right fragment                                                                                                                                                                                              |
| 12 0260-R3              | CGTTTTCTCAATATTATCAATCCA                                                                            |                                                                                                                                                                                                             |
| 13 Kan-F2               | ATGGCTAAAATGAGAATATCACC                                                                             | <b>Generate SK36 ΔssaACB Km<sup>f</sup> by overlap extension PCR</b><br><i>apha-3</i><br><i>apha-3</i><br>left fragment<br>left fragment<br>right fragment<br>right fragment                                |
| 14 Kan-R2               | CTAAACAATTCATCCAGTA                                                                                 |                                                                                                                                                                                                             |
| 15 0262-F1              | GCACGATGATAAGCTCCTG                                                                                 |                                                                                                                                                                                                             |
| 16 0262-R1S             | TCTCATTTTAGCCATCTCATACACCTCTATAGT                                                                   |                                                                                                                                                                                                             |
| 17 0260-F3              | GATGAATTGTTTTAGTAATAAAAGGTTAGGAAGACA                                                                |                                                                                                                                                                                                             |
| 18 0260-R3              | CGTTTTCTCAATATTATCAATCCA                                                                            |                                                                                                                                                                                                             |
| 19 spcUP-short          | CCGCTCTAGAACTAGTGGATCC                                                                              | <b>Generate SK405 Sc<sup>f</sup> by overlap extension PCR</b><br><i>aad9</i> with native promoter<br><i>aad9</i> with native promoter<br>left fragment<br>left fragment<br>right fragment<br>right fragment |
| 20 spcDO-long           | GAAGTTTATCTAGCAATTTTTTATAATTTTTTAAATCTG                                                             |                                                                                                                                                                                                             |
| 21 MJY1                 | CCAGACGATCACTTCATCC                                                                                 |                                                                                                                                                                                                             |
| 22 MJY5-R               | GGATCCACTAGTTCAGAGCGGGAATAGAGGTTTTTAAAGAATATTGACAAC                                                 |                                                                                                                                                                                                             |
| 23 MYJ6-F               | CAGATTAATAAAAAATTATAAAAAAATTGCTAGATAAACTTCTGTTCTAC                                                  |                                                                                                                                                                                                             |
| 24 MYJ2-R               | TGTATAGCATTTCATTCCAAG                                                                               |                                                                                                                                                                                                             |
| 25 TetProm              | CTAGGTTGATTTTCGTTCTG                                                                                | <b>Generate SK405 Δlipo by overlap extension PCR</b><br><i>tetM</i> with native promoter<br><i>tetM</i> with native promoter<br>SK405Δlipo<br>SK405Δlipo<br>SK405Δlipo<br>SK405Δlipo                        |
| 26 Tet_R1               | GAGTAAAAATTTTTAGACACTAAGTTATTTTATTGAACATATATC                                                       |                                                                                                                                                                                                             |
| 27 SK405_lipo_Lflank_L1 | ACGCTGCTGGATTTTGATAC                                                                                |                                                                                                                                                                                                             |
| 28 SK405_lipo_Lflank_R1 | TATTCACGAACGAAAATCAACCTAGTTGCAGTCTCCTTATGGAAC                                                       |                                                                                                                                                                                                             |
| 29 SK405_lipo_Rflank_L1 | AAATAACTTAGTGTCTAAAAAATTTTAACTCTGTCAAG                                                              |                                                                                                                                                                                                             |
| 30 SK405_lipo_Rflank_R1 | GAAAAAACGGGACATAC                                                                                   |                                                                                                                                                                                                             |
| 31 kan F2p              | GATAAACCCAGCGAACCATTGTA                                                                             | <b>Generate SK405 Δtel by overlap extension PCR</b><br><i>apha3</i> with native promoter<br><i>apha3</i> with native promoter<br>SK405Δtel<br>SK405Δtel<br>SK405Δtel<br>SK405Δtel                           |
| 32 Kan-R2Med            | AGGTACTAAAACAATTCATCCAGT                                                                            |                                                                                                                                                                                                             |
| 33 SK405-F1             | TGGCCAGTTCGATAGCTTCA                                                                                |                                                                                                                                                                                                             |
| 34 SK405-R1             | GCTCAACTGTCACTTTAATACTTCA                                                                           |                                                                                                                                                                                                             |
| 35 SK405-F3             | ACACACGCATTAATACTGAAC                                                                               |                                                                                                                                                                                                             |
| 36 SK405-R3             | CTCCTTATCGGGACATCGCT                                                                                |                                                                                                                                                                                                             |
| 37 Spec_Bseq_L1         | CCGCTCTAGAACTAGTGG                                                                                  | <b>Generate BC strains by overlap extension PCR</b><br><i>aad9</i> with native promoter<br><i>aad9</i> with native promoter                                                                                 |
| 38 Spec_Bseq_R1         | CGGCGGCCTTATAATTTTTTAAATCT                                                                          |                                                                                                                                                                                                             |
| 39 Lflank_36Bseq_L1     | ATTAACACTCTATGAGTAAAC<br>TCCACTAGTTCTAGAGCGGG <b>GACTGACTAC</b> AGTTGCTATCACAGGTGGACGAATAGAGGTTTTTA | BC strains: SK36,<br>BC strains: SK36, SK353, SK150, SK160, SK330, SK405, SK408, SK1056, SK1057, SK1058, SK1059                                                                                             |
| 40 Lflank_36Bseq_R1     | AAGAAT                                                                                              |                                                                                                                                                                                                             |
| 41 Rflank_36Bseq_L1     | GATTAATAAAAAATTATAAGGCCGCCGCTAGATAAACTTCTGTTCTACAC                                                  |                                                                                                                                                                                                             |
| 42 Rflank_36Bseq_R1     | AAAATTTCACTCCAAAGGTTAG<br>GATCCACTAGTTCTAGAGCGGG <b>TAAACCACT</b> AGTTGCTATCACAGGTGGACGAATAGAGGCTTT |                                                                                                                                                                                                             |
| 43 Lflank_49Bseq_R1     | TAAAGAA                                                                                             |                                                                                                                                                                                                             |
|                         |                                                                                                     | BC strains: SK49                                                                                                                                                                                            |

|                                                                                    |                                                                                                                                 |                                                  |
|------------------------------------------------------------------------------------|---------------------------------------------------------------------------------------------------------------------------------|--------------------------------------------------|
| 44 Rflank_49Bseq_L1                                                                | GATTAATAAAATTATAAGGCCGCCGCTAGATAAACTTCTGTTCTACTC<br>GATCCACTAGTTCTAGAGCGGG <b>CCAAATCCGT</b> AGTTGCTATCACAGGTGGACGAATAGAAGCTTT  | BC strains: SK49, VMC66                          |
| 45 Lflank_66Bseq_R1                                                                | TAAAGAA                                                                                                                         | BC strains: VMC66                                |
| 46 Rflank_72Bseq_R1                                                                | AAAAAATTCACCTCAAAGG<br>GATCCACTAGTTCTAGAGCGGG <b>CCCATATGTC</b> AGTTGCTATCACAGGTGGACGAACAGAGGTATT                               | BC strains: SK160, SK405, SK408, SK1056, SK1057  |
| 47 Lflank_115Bseq_R1                                                               | AAAGGCT                                                                                                                         | BC strains: SK115,                               |
| 48 Rflank_115Bseq_L1                                                               | GATTAATAAAATTATAAGGCCGCCGATAGATAAACTTCTGTTCTACTC                                                                                | BC strains: SK115,                               |
| 49 Lflank_150Bseq_L1                                                               | ATTGAACACTCAATGAGTAAAC<br>GATCCACTAGTTCTAGAGCGGG <b>TGCTAGTTA</b> AGTTGCTATCACAGGTGGACGAATAGAGGCTTT                             | BC strains: SK150, SK355                         |
| 50 Lflank_150Bseq_R1                                                               | TAAAGAA                                                                                                                         | BC strains: SK150,                               |
| 51 Rflank_150Bseq_R1                                                               | CTTTTGGAGTGTTTTTTATCTAAAATTTG<br>GATCCACTAGTTCTAGAGCGGG <b>CGACACATCC</b> AGTTGCTATCACAGGTGGACGAATAGAAGCTTT                     | BC strains: SK49, VMC66, SK150, SK355, SK1056    |
| 52 Lflank_160Bseq_R1                                                               | TAAAGAA<br>GATCCACTAGTTCTAGAGCGGG <b>CTATAACTGA</b> AGTTGCTATCACAGGTGGACGAATAGAGGCTTC                                           | BC strains: SK160,                               |
| 53 Lflank_330Bseq_R1                                                               | TAAAGAA                                                                                                                         | BC strains: SK330,                               |
| 54 Rflank_330Bseq_R1                                                               | AAAAATTCACCTCAAAGG<br>GATCCACTAGTTCTAGAGCGGG <b>TACCCATAT</b> AGTTGCTATCACAGGTGGACGAGTAGAGGTTTT                                 | BC strains: SK330,                               |
| 55 Lflank_340Bseq_R1                                                               | TAAAGAA                                                                                                                         | BC strains: SK340, SK678                         |
| 56 Rflank_340Bseq_L1                                                               | GATTAATAAAATTATAAGGCCGCCGCTAGATAAACTTCTTTTCAACACG                                                                               | BC strains: SK340, SK1058                        |
| 57 Rflank_340Bseq_R1                                                               | CTTTTGGAGTTTTTTTTATCTAAAATTTG                                                                                                   | BC strains: SK340                                |
| 58 Lflank_353Bseq_L1                                                               | ATTAACAATCTATGGGTAACCC<br>GATCCACTAGTTCTAGAGCGGG <b>GTGTTTGT</b> AGTTGCTATCACAGGTGGACGAATAGAGGCTTC                              | BC strains: SK353,                               |
| 59 Lflank_353Bseq_R1                                                               | TAAAGAA<br>GATCCACTAGTTCTAGAGCGGG <b>CCCACAAGAG</b> AGTTGCTATCACAGGTGGACGAATAGAGGCTTC                                           | BC strains: SK353,                               |
| 60 Lflank_355Bseq_R1                                                               | TTAAAGAA                                                                                                                        | BC strains: SK355,                               |
| 61 Rflank_355Bseq_L1                                                               | GATTAATAAAATTATAAGGCCGCCGCTAGATAAACTTCTGTTCTACAAG<br>GATCCACTAGTTCTAGAGCGGG <b>GCAACTTTGG</b> AGTTGCTATCACAGGTGGACGAATAGAGGTTTT | BC strains: SK355,                               |
| 62 Lflank_405Bseq_R1                                                               | TAAAGAA<br>GATCCACTAGTTCTAGAGCGGG <b>CATTGACTAC</b> AGTTGCTATCACAGGTGGACGAATAGAAGCTTT                                           | BC strains: SK405                                |
| 63 Lflank_408Bseq_R1                                                               | TAAAGAA<br>GATCCACTAGTTCTAGAGCGGG <b>CGCACCAATG</b> AGTTGCTATCACAGGTGGACGAATAGAGGCTTC                                           | BC strains: SK408                                |
| 64 Lflank_678Bseq_R1                                                               | CTAAAGAA                                                                                                                        | BC strains: SK678                                |
| 65 Rflank_678Bseq_L1                                                               | GATTAATAAAATTATAAGGCCGCCGCTAGATAAACTTCTGTTCTACAC<br>GATCCACTAGTTCTAGAGCGGG <b>GTATAAAGCG</b> AGTTGCTATCACAGGTGGACGAATAGAGGCTTC  | BC strains: SK678                                |
| 66 Lflank_1056Bseq_R1                                                              | TTAAAGAA<br>GATCCACTAGTTCTAGAGCGGG <b>GTGAGCCCAA</b> AGTTGCTATCACAGGTGGACGAATAGAGGTTTT                                          | BC strains: SK1056                               |
| 67 Lflank_1057Bseq_R1                                                              | TTAAAGAA<br>GATCCACTAGTTCTAGAGCGGG <b>GTATCCTGGC</b> AGTTGCTATCACAGGTGGACGAGTAGAGGTTTT                                          | BC strains: SK1057                               |
| 68 Lflank_1058Bseq_R1                                                              | TTAAAGAA<br>GATCCACTAGTTCTAGAGCGGG <b>CTTAGTCGCC</b> AGTTGCTATCACAGGTGGACGAATAGAGGATTT                                          | BC strains: SK1058                               |
| 69 Lflank_1087Bseq_R1                                                              | TAAAGAA                                                                                                                         | BC strains: SK1059                               |
| 70 Rflank_1087Bseq_L1                                                              | GATTAATAAAATTATAAGGCCGCCGCTAGATAAACTTCTGTTCTACAC                                                                                | BC strains: SK1059                               |
| <b>Amplification of BC strains for Illumina Sequencing Using Staggered Primers</b> |                                                                                                                                 |                                                  |
| 71 Bseq-quant1L                                                                    | 5' TCGTCGGCAGCGTCAGATGTGTATAAGAGACAGCCACCTGTGATAGCAACT                                                                          | Total DNA: inocula and homogenized rabbit tissue |
| 72 Bseq-quant2L                                                                    | 5' TCGTCGGCAGCGTCAGATGTGTATAAGAGACAGTCCACCTGTGATAGCAACT                                                                         | Total DNA: inocula and homogenized rabbit tissue |
| 73 Bseq-quant3L                                                                    | 5' TCGTCGGCAGCGTCAGATGTGTATAAGAGACAGGTCCACCTGTGATAGCAACT                                                                        | Total DNA: inocula and homogenized rabbit tissue |
| 74 Bseq-quant4L                                                                    | 5' TCGTCGGCAGCGTCAGATGTGTATAAGAGACAGCGACCACCTGTGATAGCAACT                                                                       | Total DNA: inocula and homogenized rabbit tissue |
| 75 Bseq-quant1R                                                                    | 5' GTCTCGTGGGCTCGGAGATGTGTATAAGAGACAGTATTCAAATATATCCTCCTCAC                                                                     | Total DNA: inocula and homogenized rabbit tissue |
| 76 Bseq-quant2R                                                                    | 5' GTCTCGTGGGCTCGGAGATGTGTATAAGAGACAGATATTCAAATATATCCTCCTCAC                                                                    | Total DNA: inocula and homogenized rabbit tissue |
| 77 Bseq-quant3R                                                                    | 5' GTCTCGTGGGCTCGGAGATGTGTATAAGAGACAGTCTATTCAAATATATCCTCCTCAC                                                                   | Total DNA: inocula and homogenized rabbit tissue |
| 78 Bseq-quant4R                                                                    | 5' GTCTCGTGGGCTCGGAGATGTGTATAAGAGACAGCTATATTCAAATATATCCTCCTCAC                                                                  | Total DNA: inocula and homogenized rabbit tissue |

<sup>1</sup>Red letters indicate unique barcodes
